# Supplementary material for: Coronene guest molecule selectivity in host templates formed by hydrogen bonding and van der Waals forces at liquid/solid interfaces
Source: Royal Society of Chemistry journal article supplement (doi:10.1039/d3nj00382e), 2023-01-01
Supplement: d3nj00382e1.pdf [file d3nj00382e1.pdf]

## Supporting Information

### Coronene Guest Molecule Selectivity in the Host Templates Formed by Hydrogen Bond and Van der Waals Force at Liquid/Solid Interface

Yufei Zhang <sup>a,b,c</sup>, Peng Lei <sup>a,b</sup>, Ting Meng <sup>a,b</sup>, Ke Deng <sup>\*,a,b</sup>, Xunwen Xiao <sup>\*,c</sup>, and Qingdao Zeng <sup>\*,a,b</sup>

*a. CAS Key Laboratory of Standardization and Measurement for Nanotechnology, CAS Center for Excellence in Nanoscience, National Center for Nanoscience and Technology (NCNST), Beijing 100190, P. R. China.*

*b. Center of Material Science and Optoelectronics Engineering, University of Chinese Academy of Sciences, Beijing 100049, P. R. China.*

*c. School of Materials and Chemical Engineering, Ningbo University of Technology, Ningbo, Zhejiang 315211, P. R. China.*

#### S1. Acronyms table

Table S1 The definition of Acronyms in the main text.

| Acronyms            | Full name                                                                                  |
|---------------------|--------------------------------------------------------------------------------------------|
| H <sub>6</sub> PDB  | 1,3,5-tris(4-(3,5-dicarboxyphenyl) diphenyl) benzene                                       |
| H <sub>6</sub> PAB  | 1,3,5-tris (4-(3,5-dicarboxyphenylacetylene) phenyl) benzene                               |
| COR                 | 1,3,5-tris (4-(3,5-dicarboxyphenylacetylene) phenyl) benzene                               |
| HPB                 | Hexaphenylbenzene derivatives                                                              |
| H <sub>4</sub> ETTC | 4',4'',4''',4''''-(ethene-1,1,2,2-tetrayl) tetrakis-([1,1'-biphenyl]-3-carboxylic acid)    |
| H <sub>8</sub> ETTB | 4',4'',4''',4''''-(ethene-1,1,2,2-tetrayl) tetrakis([1,1'-biphenyl]-3,5-dicarboxylic acid) |

#### S2. Sample Preparation

Table S2 The information of all the samples used in the experiment.

| Sample                | Obtained from                                                  | Purity |
|-----------------------|----------------------------------------------------------------|--------|
| H <sub>6</sub> PDB    | Jilin Chinese Academy of Sciences-Yanshen Technology Co., Ltd. | 98%    |
| H <sub>6</sub> PAB    | Jilin Chinese Academy of Sciences-Yanshen Technology Co., Ltd. | 98%    |
| HPB                   | synthesized by the previous reference                          | 98%    |
| COR                   | Beijing HWRK Chemical Corporation                              | 98%    |
| 1-heptanoic acid (HA) | J&K Scientific                                                 | 98%    |

All the samples were at 98% purity and used directly without further purification. All the samples were dissolved in HA solvent. The concentrations of H<sub>6</sub>PDB, H<sub>6</sub>PAB and HPB solution were 10% of their saturated concentrations. COR/HA solution was prepared in C1 = 10<sup>-5</sup> mol·L<sup>-1</sup>, C2 = 8 × C1, and saturated concentration (C3) respectively. H<sub>6</sub>PAB and HPB solution was premixed in 1:1 ratio. The volume of COR added in-suit was the same as the premixed solution.

**S3. Large scale STM image of H<sub>6</sub>PDB and H<sub>6</sub>PAB co-assembled with saturated COR/HA solution(C3)**

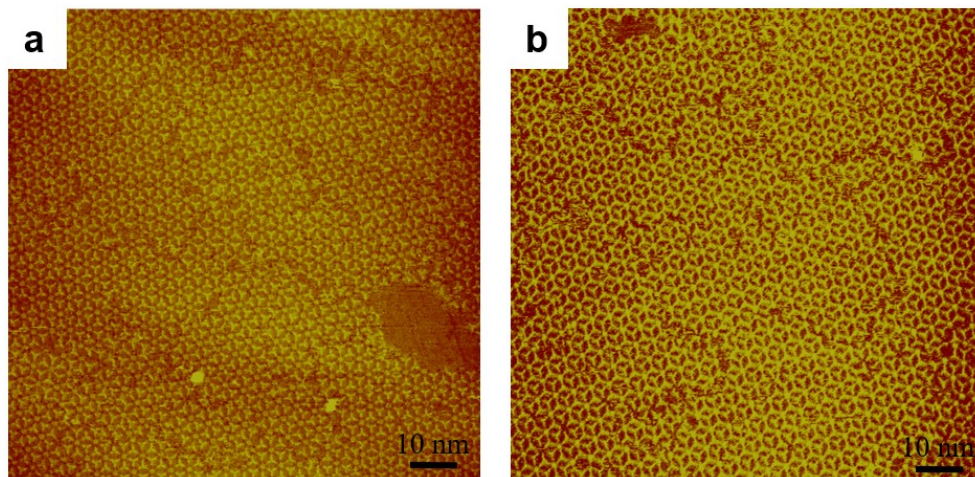

Figure S1. (a) Large scale STM image of H<sub>6</sub>PDB/COR(C3) co-assembled structure ( $I_{\text{set}} = 259.4$  pA,  $V_{\text{bias}} = 809.9$  mV,  $100 \text{ nm} \times 100 \text{ nm}$ ); (b) Large scale STM image of H<sub>6</sub>PAB/COR(C3) co-assembled structure ( $I_{\text{set}} = 268.6$  pA,  $V_{\text{bias}} = 806.3$  mV,  $100 \text{ nm} \times 100 \text{ nm}$ ).

**S4. High resolution STM image and molecular model of HPB self-assembled structure and HPB/COR co-assembled structure**

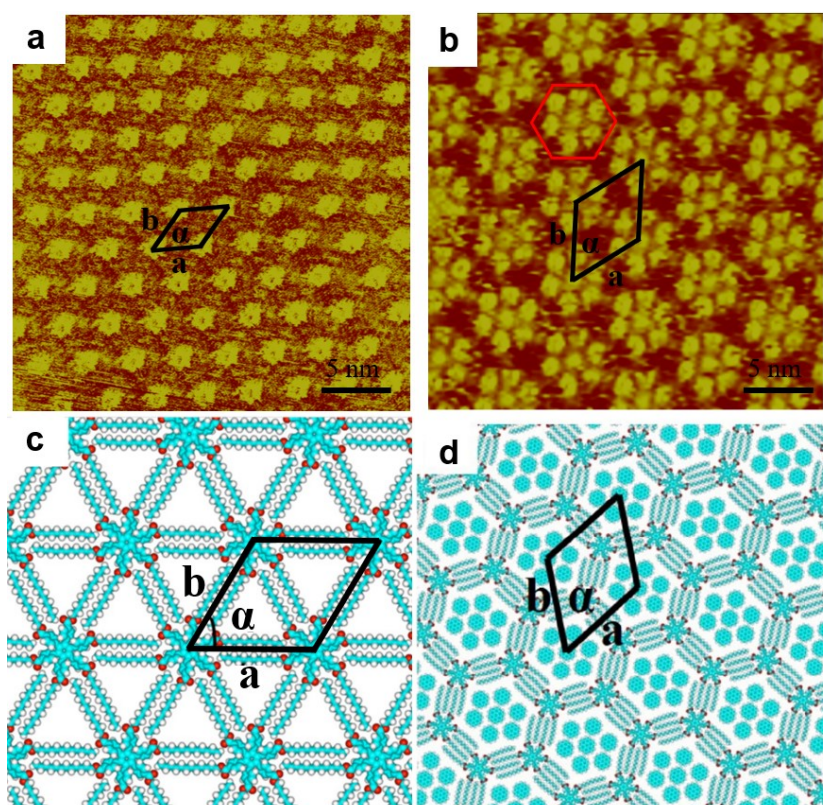

Figure S2. (a) High resolution STM image of HPB self-assembled structure ( $I_{\text{set}} = 271$  pA,  $V_{\text{bias}} = 799$  mV,  $25 \text{ nm} \times 25 \text{ nm}$ ); (b) High resolution STM image of HPB/COR(C3) co-assembled structure ( $I_{\text{set}} = 198.4$  pA,  $V_{\text{bias}} = 739.7$  mV,  $25 \text{ nm} \times 25 \text{ nm}$ ); (c) (d) Proposed models of the structures in (a) and (b) respectively.
